# Supplementary material for: Coarse and giant particles are ubiquitous in Saharan dust export regions and are radiatively significant over the Sahara
Source: Copernicus journal article supplement (doi:10.5194/acp-19-15353-2019), 2019-12-17
Supplement: Supplementary file [file acp-19-15353-2019-supplement-title-page.pdf › acp-19-15353-2019-supplement-title-page.pdf]

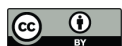

*Supplement of*

## **Coarse and giant particles are ubiquitous in Saharan dust export regions and are radiatively significant over the Sahara**

**Claire L. Ryder et al.**

*Correspondence to:* Claire L. Ryder ([c.l.ryder@reading.ac.uk](mailto:c.l.ryder@reading.ac.uk))

- [acp-19-15353-2019-supplement-title-page.pdf](#)
- [Supplement\\_v6\\_190501.pdf](#)
- [deff\\_age\\_multicamp.txt](#)

The copyright of individual parts of the supplement might differ from the CC BY 4.0 License.
